# Supplementary material for: Iron supplementation enhances RSL3-induced ferroptosis to treat naïve and prevent castration-resistant prostate cancer
Source: PubMed Central journal article supplement (PMC9986230; doi:10.1038/s41420-023-01383-4), 2023-03-06
Supplement: 41420_2023_1383_MOESM1_ESM.pdf [file 41420_2023_1383_MOESM1_ESM.pdf]

**FIGURE 1**

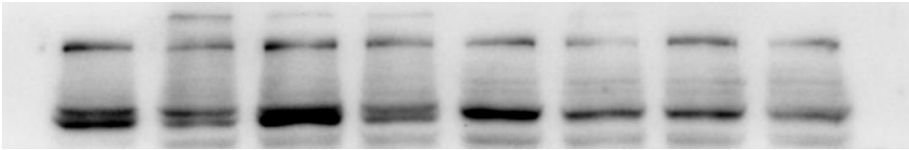

TfR1

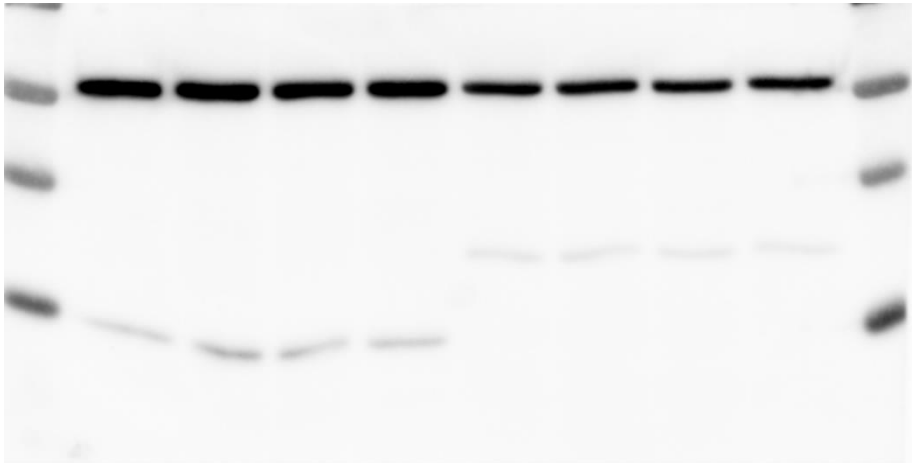

Tubulin

**FIGURE 1**

**DU145cells**

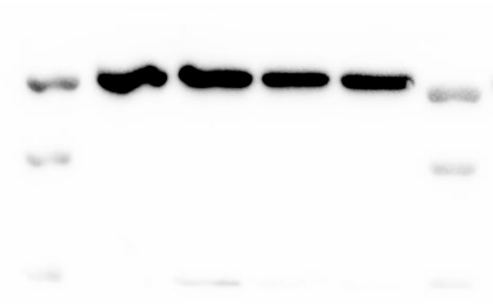

Tubulin

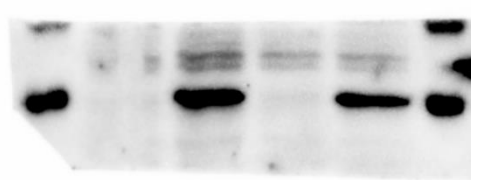

Ferritin

**TRAMP-C2**

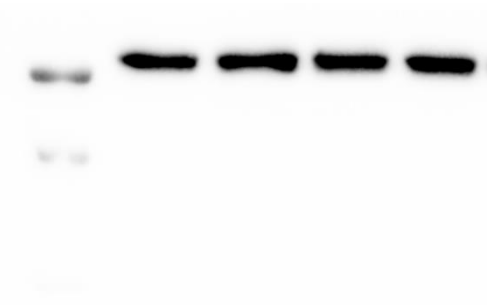

Tubulin

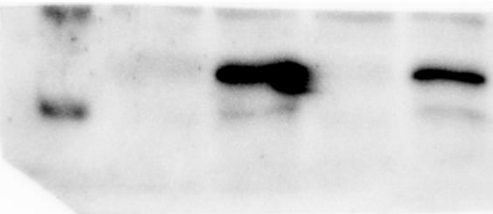

Ferritin

FIGURE 3

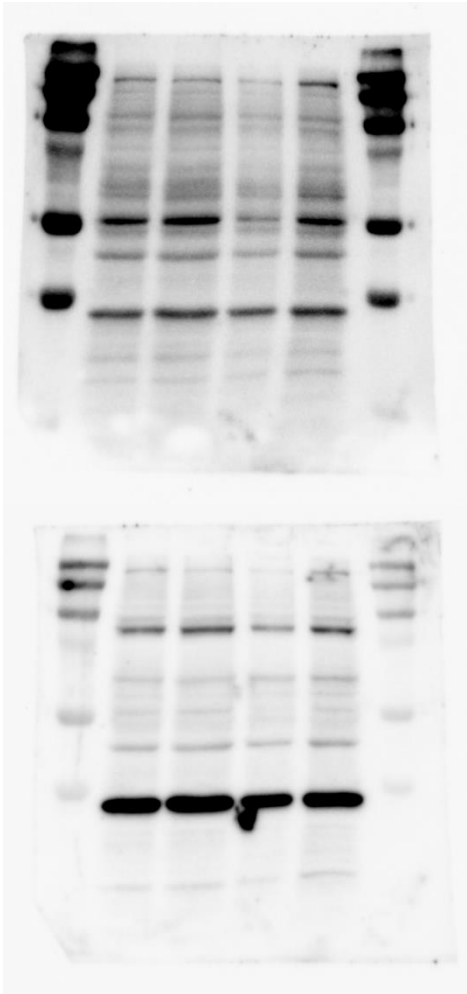

Tp53

Gapdh
